# Supplementary material
Source: PubMed Central journal article supplement (PMC7250718)
Supplement: NIHMS1573592-supplement-Supplementary_Material.pdf [file NIHMS1573592-supplement-Supplementary_Material.pdf]

## Supplementary Online Content

Poldrack RA, Huckins G, Varoquaux G. Establishment of best practices for evidence for prediction: a review. *JAMA Psychiatry*. Published November 27, 2019.  
doi:10.1001/jamapsychiatry.2019.3671

### **eTable.** Description of Studies Reviewed

This supplementary material has been provided by the authors to give readers additional information about their work.

**eTable.** Description of Studies Reviewed

| No. | DOI                                                                                               | Title                                                                                                                                                                                | Journal                                            | Clinical Application | n  | Shared Data Set | Within- or Between-Subject Prediction | Predictor | Predictor details                                  | Predictand                         | ML Technique      | Multivariate or univariate? | Classification or regression? | CV    | Permutation? | Holdout? | Metric                  |
|-----|---------------------------------------------------------------------------------------------------|--------------------------------------------------------------------------------------------------------------------------------------------------------------------------------------|----------------------------------------------------|----------------------|----|-----------------|---------------------------------------|-----------|----------------------------------------------------|------------------------------------|-------------------|-----------------------------|-------------------------------|-------|--------------|----------|-------------------------|
| 1   | <a href="https://doi.org/10.1155/2018/6142898">https://doi.org/10.1155/2018/6142898</a>           | Mutual Information Better Quantifies Brain Network Architecture in Children with Epilepsy                                                                                            | Computational and Mathematical Methods in Medicine | No                   | 24 |                 | Between                               | rsfMRI    | Network metrics                                    | IQ                                 | Random forest     | Multivariate                | Regression                    | Other | No           | No       | Explained variance      |
| 2   | <a href="https://doi.org/10.3389/fpsy.2018.00532">https://doi.org/10.3389/fpsy.2018.00532</a>     | Pre-treatment Resting-State Functional MR Imaging Predicts the Long-Term Clinical Outcome After Short-Term Paroxetine Treatment in Post-traumatic Stress Disorder                    | Frontiers in Psychiatry                            | Yes                  | 20 |                 | Between                               | rsfMRI    | Network metrics; ALFF                              | Response to paroxetine (long-term) | SVM               | Multivariate                | Classification                | LOO   | Yes          | No       | Classification accuracy |
| 3   | <a href="https://doi.org/10.1016/j.jad.2017.12.041">https://doi.org/10.1016/j.jad.2017.12.041</a> | Memory performance predicts response to psychotherapy for depression in bipolar disorder: A pilot randomized controlled trial with exploratory functional magnetic resonance imaging | Journal of Affective Disorders                     | Yes                  | 17 |                 | Between                               | Task fMRI | Verbal memory task                                 | Response to CBT and SP             | Linear regression | Univariate                  | Regression                    | None  |              |          | Regression significance |
| 4   | <a href="https://doi.org/10.1186/s13063-018-2995-7">https://doi.org/10.1186/s13063-018-2995-7</a> | Effects of recombinant human erythropoietin on cognition and neural activity in remitted patients with mood disorders and                                                            | Trials                                             | Yes                  | 52 |                 | Between                               | Task fMRI | Picture encoding, working memory, and verbal tasks | Response to erythropoietin         | Regression        | Univariate                  | Regression                    | None  |              |          | Regression significance |

|   |                                                                                                                     |                                                                                                                        |                                 |     |     |     |         |           |                 |                                             |                             |                                           |                               |             |     |                                                                               |                                              |
|---|---------------------------------------------------------------------------------------------------------------------|------------------------------------------------------------------------------------------------------------------------|---------------------------------|-----|-----|-----|---------|-----------|-----------------|---------------------------------------------|-----------------------------|-------------------------------------------|-------------------------------|-------------|-----|-------------------------------------------------------------------------------|----------------------------------------------|
|   |                                                                                                                     | first-degree relatives of patients with psychiatric disorders- a study protocol for a randomized controlled trial      |                                 |     |     |     |         |           |                 |                                             |                             |                                           |                               |             |     |                                                                               |                                              |
| 5 | <a href="https://doi.org/10.1016/j.neuroimage.2018.10.074">https://doi.org/10.1016/j.neuroimage.2018.10.074</a>     | Connectome-based models predict attentional control in aging adults                                                    | NeuroImage                      | Yes | 34  |     | Between | Task fMRI | Stroop task     | Reaction time in Stroop task                | GLM                         | Univariate and multivariate (2 variables) | Regression                    | None        |     | This study itself can be considered a holdout, as the model was predetermined | Explained variance                           |
| 6 | <a href="https://doi.org/10.1016/j.neuroscience.2018.10.036">https://doi.org/10.1016/j.neuroscience.2018.10.036</a> | Resting-state Functional Connectivity and Deception: Exploring Individualized Deceptive Propensity by Machine Learning | Neuroscience                    | No  | 47  |     | Between | rsfMRI    | Network metrics | Deception degree in ultimatum game          | Relevance vector regression | Multivariate                              | Regression                    | LOO, k-fold | Yes | Yes                                                                           | Pearson correlation, MAE                     |
| 7 | <a href="https://doi.org/10.1016/j.neuroimage.2018.10.062">https://doi.org/10.1016/j.neuroimage.2018.10.062</a>     | Intersubject similarity of personality is associated with intersubject similarity of brain connectivity patterns       | NeuroImage                      | No  | 984 | HCP | Between | rsfMRI    | FC              | Single-item ratings on FFM personality test | LASSO logistic regression   | Multivariate                              | Classification                | K-fold      | Yes | Yes                                                                           | Classification accuracy                      |
| 8 | <a href="https://doi.org/10.1016/j.neuroimage.2018.10.054">https://doi.org/10.1016/j.neuroimage.2018.10.054</a>     | Deep neural network predicts emotional responses of the human brain from functional magnetic resonance imaging         | NeuroImage                      | No  | 10  |     | Within  | Task fMRI | Auditory task   | Emotion rating                              | DNN                         | Multivariate                              | Regression and classification | K-fold      | Yes | No                                                                            | Pearson correlation, classification accuracy |
| 9 | <a href="https://doi.org/10.3389/fnhum.2018.00405">https://doi.org/10.3389/fnhum.2018.00405</a>                     | Whole-Brain Network Connectivity Underlying the Human Speech Articulation as Emerged Integrating Direct Electric       | Frontiers in Human Neuroscience | No  | 7   |     | Between | rsfMRI    |                 | Speech articulation network location        | Other                       |                                           | Regression                    | None        |     |                                                                               | Correlation                                  |

|    |                                                                                                     |                                                                                                                                |                                       |     |    |  |         |           |                                                                                    |                                                               |                                             |              |                |        |     |    |                                                        |
|----|-----------------------------------------------------------------------------------------------------|--------------------------------------------------------------------------------------------------------------------------------|---------------------------------------|-----|----|--|---------|-----------|------------------------------------------------------------------------------------|---------------------------------------------------------------|---------------------------------------------|--------------|----------------|--------|-----|----|--------------------------------------------------------|
|    |                                                                                                     | Stimulation, Resting State fMRI and Tractography                                                                               |                                       |     |    |  |         |           |                                                                                    |                                                               |                                             |              |                |        |     |    |                                                        |
| 10 | <a href="https://doi.org/10.1002/hbm.24432">https://doi.org/10.1002/hbm.24432</a>                   | I lie, why don't you: Neural mechanisms of individual differences in self-serving lying                                        | Human Brain Mapping                   | No  | 37 |  | Between | Task fMRI | Color-reporting task                                                               | Degree of dishonesty                                          | Kernel ridge regression                     | Multivariate | Regression     | LOO    | Yes | No | Pearson correlation, coefficient of determination, MSE |
| 11 | <a href="https://doi.org/10.1002/jmri.26214">https://doi.org/10.1002/jmri.26214</a>                 | Disrupted Functional Connectivity and Activity in the White Matter of the Sensorimotor System in Patients With Pontine Strokes | Journal of Magnetic Resonance Imaging | Yes | 16 |  | Between | fFA       | FA was measured in functionally mapped white matter tracts (hence "functional" FA) | Motor function (Fugl-Meyer score)                             | Partial least squares regression            | Multivariate | Regression     | LOO    | No  | No | Pearson correlation                                    |
| 12 | <a href="https://doi.org/10.1016/j.nicl.2018.10.011">https://doi.org/10.1016/j.nicl.2018.10.011</a> | Using fMRI and machine learning to predict symptom improvement following cognitive behavioural therapy for psychosis           | NeuroImage: Clinical                  | Yes | 22 |  | Between | Task fMRI | Facial affect task                                                                 | Response to CBTp: psychotic and affective symptom improvement | Kernel ridge regression                     | Multivariate | Regression     | K-fold | Yes | No | Pearson, MSE                                           |
| 13 | <a href="https://doi.org/10.1038/s41598-018-33621-6">https://doi.org/10.1038/s41598-018-33621-6</a> | Common Functional Brain States Encode both Perceived Emotion and the Psychophysiological Response to Affective Stimuli         | Scientific Reports                    | No  | 19 |  | Within  | Task fMRI | Image viewing task                                                                 | Reported valence and arousal; skin conductance                | SVM                                         | Multivariate | Regression     | LOO    | Yes | No | Pearson correlation                                    |
| 14 | <a href="https://doi.org/10.1017/S0033291718002866">https://doi.org/10.1017/S0033291718002866</a>   | Machine learning multivariate pattern analysis predicts classification of posttraumatic stress disorder and its                | Psychological Medicine                | Yes | 18 |  | Between | rsfMRI    | ALFF, FC                                                                           | PTSD diagnosis                                                | Multi-class Gaussian process classification | Multivariate | Classification | LOO    | Yes | No | Classification accuracy                                |

|    |                                                                                                         |                                                                                                                                               |                            |     |     |       |                    |            |                                 |                                           |                                  |                             |                |       |     |                      |                           |
|----|---------------------------------------------------------------------------------------------------------|-----------------------------------------------------------------------------------------------------------------------------------------------|----------------------------|-----|-----|-------|--------------------|------------|---------------------------------|-------------------------------------------|----------------------------------|-----------------------------|----------------|-------|-----|----------------------|---------------------------|
|    |                                                                                                         | dissociative subtype: a multimodal neuroimaging approach                                                                                      |                            |     |     |       |                    |            |                                 |                                           |                                  |                             |                |       |     |                      |                           |
| 15 | <a href="https://doi.org/10.1038/s41467-018-06350-7">https://doi.org/10.1038/s41467-018-06350-7</a>     | Cerebello-thalamo-cortical hyperconnectivity as a state-independent functional neural signature for psychosis prediction and characterization | Nature Communications      | Yes | 302 | NAPLS | Between            | Task fMRI  | Memory and emotion task battery | Time of conversion to psychosis           | Regression                       | Univariate                  | Regression     | None  |     | Spearman correlation |                           |
| 16 | <a href="https://doi.org/10.1017/pen.2018.8">https://doi.org/10.1017/pen.2018.8</a>                     | Resting-state functional brain connectivity best predicts the personality dimension of openness to experience                                 | Personal Neuroscience      | No  | 884 | HCP   | Between            | rsfMRI     | FC                              | Big 5 traits                              | Elastic net regression           | Multivariate and univariate | Regression     | LXO   | Yes | No                   | Pearson correlation, RMSD |
| 17 | <a href="https://doi.org/10.3389/fnins.2018.00569">https://doi.org/10.3389/fnins.2018.00569</a>         | Influence of Individual Differences in fMRI-Based Pain Prediction Models on Between-Individual Prediction Performance..p                      | Frontiers in Neuroscience  | Yes | 30  |       | Between and within | Task fMRI  | Pain response task              | Pain rating                               | Partial least squares regression | Multivariate                | Regression     | Other | No  | No                   | MAE, MPB                  |
| 18 | <a href="https://doi.org/10.1007/s11682-018-9949-2">https://doi.org/10.1007/s11682-018-9949-2</a>       | Overall survival time prediction for high-grade glioma patients based on large-scale brain functional networks                                | Brain Imaging and Behavior | Yes | 68  |       | Between            | rsfMRI     | Network metrics                 | Survival time (2 classes: short and long) | SVM                              | Multivariate                | Classification | LOO   | No  | No                   | Classification accuracy   |
| 19 | <a href="https://doi.org/10.1371/journal.pone.0202504">https://doi.org/10.1371/journal.pone.0202504</a> | Stronger prediction of motor recovery and outcome post-stroke by cortico-spinal tract integrity than functional connectivity                  | PLOS One                   | Yes | 31  |       | Between            | rsfMRI, FA | FC, FA                          | Motor performance                         | Regression                       | Multivariate                | Regression     | None  |     |                      | Explained variance        |

|    |                                                                                                                 |                                                                                                                                          |                                                                        |     |      |                          |                 |           |                          |                                                         |                           |              |                |        |     |     |                                                |
|----|-----------------------------------------------------------------------------------------------------------------|------------------------------------------------------------------------------------------------------------------------------------------|------------------------------------------------------------------------|-----|------|--------------------------|-----------------|-----------|--------------------------|---------------------------------------------------------|---------------------------|--------------|----------------|--------|-----|-----|------------------------------------------------|
| 20 | <a href="https://doi.org/10.1016/j.nicl.2018.08.016">https://doi.org/10.1016/j.nicl.2018.08.016</a>             | Exploring the prediction of emotional valence and pharmacologic effect across fMRI studies of antidepressants                            | NeuroImage: Clinical                                                   | Yes | 306  | From previous literature | Between         | Task fMRI | Facial affect task       | Drug vs. placebo; positive vs. negative valence trial   | Gradient boosting machine | Multivariate | Classification | LXO    | No  | Yes | Classification accuracy                        |
| 21 | <a href="https://doi.org/10.1016/j.neuroimage.2018.08.038">https://doi.org/10.1016/j.neuroimage.2018.08.038</a> | Connectome-based individualized prediction of temperament trait scores                                                                   | NeuroImage                                                             | No  | 360  | UESTC, HCP               | Between         | rsfMRI    | FC                       | Temperament scores; neuroticism and extraversion in HCP | LASSO regression          | Multivariate | Regression     | K-fold | Yes | Yes | Pearson correlation, RMSE                      |
| 22 | <a href="https://doi.org/10.1098/rstb.2017.0284">https://doi.org/10.1098/rstb.2017.0284</a>                     | A distributed brain network predicts general intelligence from resting-state human neuroimaging data                                     | Philosophical Transactions B                                           | No  | 1181 | HCP                      | Between         | rsfMRI    | FC                       | g                                                       | Elastic net regression    | Multivariate | Regression     | LXO    | Yes | No  | Pearson correlation, explained variance, nRMSE |
| 23 | <a href="https://doi.org/10.1016/j.neuroimage.2018.08.003">https://doi.org/10.1016/j.neuroimage.2018.08.003</a> | Towards response success prediction: An integrative approach using high-T resolution fMRI and autonomic indices                          |                                                                        | No  | 33   |                          | Between, pooled | Task fMRI | Response inhibition task | Response inhibition performance                         | Regression                | Univariate   | Regression     | None   |     |     | Spearman correlation                           |
| 24 | PMID: 30079274                                                                                                  | Parameter-Free Centralized Multi-Task Learning for Characterizing Developmental Sex Differences in Resting State Functional Connectivity | The Thirty-Second AAAI Conference on Artificial Intelligence (AAAI-18) | No  | 1041 | PNC                      | Between         | rsfMRI    | FC                       | Age                                                     | Lasso regression          | Multivariate | Regression     | K-fold | No  | No  | Correlation                                    |
| 25 | <a href="https://doi.org/10.1109/ISBI.2018.8363532">https://doi.org/10.1109/ISBI.2018.8363532</a>               | Brain age prediction based on resting-state functional connectivity patterns using convolutional neural networks                         | Proc IEEE Int Symp Biomed Imaging                                      | Yes | 983  | PNC                      | Between         | rsfMRI    | Voxel-wise FC            | Brain age                                               | CNN                       | Multivariate | Regression     | K-fold | No  | No  | Pearson correlation, MAE                       |

|    |                                                                                                     |                                                                                                                                                |                                                                   |     |     |          |                 |                   |                                                                                                    |                                   |                                     |                             |                |        |     |     |                                      |
|----|-----------------------------------------------------------------------------------------------------|------------------------------------------------------------------------------------------------------------------------------------------------|-------------------------------------------------------------------|-----|-----|----------|-----------------|-------------------|----------------------------------------------------------------------------------------------------|-----------------------------------|-------------------------------------|-----------------------------|----------------|--------|-----|-----|--------------------------------------|
| 26 | <a href="https://doi.org/10.1073/pnas.1712811115">https://doi.org/10.1073/pnas.1712811115</a>       | Neural detection of socially valued community members                                                                                          | PNAS                                                              | No  | 49  |          | Between, pooled | Task fMRI         | Face viewing task                                                                                  | Social value of viewed individual | LASSO regression, linear regression | Multivariate and univariate | Classification | LOO    | Yes | No  | Correlation, classification accuracy |
| 27 | <a href="https://doi.org/10.1038/s41467-018-04920-3">https://doi.org/10.1038/s41467-018-04920-3</a> | Task-induced brain state manipulation improves prediction of individual traits                                                                 | Nature Communications                                             | No  | 515 | HCP, PNC | Between         | Task fMRI, rsfMRI | FC                                                                                                 | Fluid intelligence                | Linear regression                   | Univariate                  | Regression     | LOO    | Yes | Yes | Explained variance                   |
| 28 | <a href="https://doi.org/10.1016/j.nicl.2018.06.006">https://doi.org/10.1016/j.nicl.2018.06.006</a> | Acute trajectories of neural activation predict remission to pharmacotherapy T in late-life depression                                         | NeuroImage: Clinical                                              | Yes | 49  |          | Between         | Task fMRI         | Emotional regulation and emotional receptivity tasks                                               | Remission of LLD                  | Least angle regression              | Multivariate                | Classification | K-fold | Yes | No  | Classification accuracy              |
| 29 | <a href="https://doi.org/10.1007/s11682-018-9926-9">https://doi.org/10.1007/s11682-018-9926-9</a>   | Evaluation of machine learning algorithms performance for the prediction of early multiple sclerosis from resting-state FMRI connectivity data | Brain Imaging and Behavior                                        | Yes | 37  |          | Between         | rsfMRI            |                                                                                                    | MS diagnosis                      | Various                             | Multivariate                | Classification | K-fold | No  | No  | Classification accuracy              |
| 30 | <a href="https://doi.org/10.1109/TCBB.2017.2776910">https://doi.org/10.1109/TCBB.2017.2776910</a>   | Early Diagnosis of Alzheimer's Disease Based on Resting-State Brain Networks and Deep Learning                                                 | IEEE/ACM TRANSACTIONS ON COMPUTATIONAL BIOLOGY AND BIOINFORMATICS | Yes | 170 | ADNI     | Between         | rsfMRI            | FC                                                                                                 | Mild cognitive impairment         | DNN                                 | Multivariate                | Classification | K-fold | Yes | No  | Classification accuracy              |
| 31 | <a href="https://doi.org/10.1002/hbm.24281">https://doi.org/10.1002/hbm.24281</a>                   | Language network measures at rest indicate individual differences in naming decline after anterior temporal lobe resection                     | Human Brain Mapping                                               | Yes | 39  |          | Between         | Task fMRI, rsfMRI | Matrix similarity approach (comparison of resting-state fMRI to "normal" control), network metrics | Naming impairment                 | Linear regression                   | Multivariate and univariate | Regression     | None   |     |     | Explained variance                   |

|    |                                                                                                                 |                                                                                                                                                    |                            |     |     |     |         |            |                                        |                                                      |                                           |              |                |        |    |    |                          |
|----|-----------------------------------------------------------------------------------------------------------------|----------------------------------------------------------------------------------------------------------------------------------------------------|----------------------------|-----|-----|-----|---------|------------|----------------------------------------|------------------------------------------------------|-------------------------------------------|--------------|----------------|--------|----|----|--------------------------|
| 32 | <a href="https://doi.org/10.1093/cercor/bhy123">https://doi.org/10.1093/cercor/bhy123</a>                       | Spatial Topography of Individual-Specific Cortical Networks Predicts Human Cognition, Personality, and Emotion                                     | Cerebral Cortex            | No  | 881 | HCP | Between | rsfMRI     | FC                                     | HCP cognitive measures                               | Kernel ridge regression                   | Multivariate | Regression     | K-fold | No | No | Correlation              |
| 33 | <a href="https://doi.org/10.1016/j.nicl.2018.01.032">https://doi.org/10.1016/j.nicl.2018.01.032</a>             | Early prediction of cognitive deficits in very preterm infants using functional T connectome data in an artificial neural network framework        | NeuroImage: Clinical       | Yes | 28  |     | Between | rsfMRI     | FC                                     | Cognitive outcome for preterm infants, 2 years later | SVM                                       | Multivariate | Classification | K-fold | No | No | Classification accuracy  |
| 34 | <a href="https://doi.org/10.1016/j.neuroimage.2018.06.001">https://doi.org/10.1016/j.neuroimage.2018.06.001</a> | The effect of machine learning regression algorithms and sample size on individualized behavioral prediction with functional connectivity features | NeuroImage                 | No  | 700 | HCP | Between | rsfMRI     | FC, network metrics                    | Cognitive scores from HCP                            | OLS, LASSO, ridge, elastic net, LSVR, RVR | Multivariate | Regression     | K-fold | No | No | Pearson correlation, MAE |
| 35 | <a href="https://doi.org/10.1007/s11682-018-9851-y">https://doi.org/10.1007/s11682-018-9851-y</a>               | Early functional MRI activation predicts motor outcome after ischemic stroke: a longitudinal, multimodal study                                     | Brain Imaging and Behavior | Yes | 34  |     | Between | rsfMRI, FA |                                        | Motor performance                                    | Linear regression                         | Multivariate | Regression     | None   |    |    | Explained variance       |
| 36 | <a href="https://doi.org/10.1002/hbm.24202">https://doi.org/10.1002/hbm.24202</a>                               | Spatio-temporal dynamics of resting-state brain networks improve single-subject prediction of schizophrenia diagnosis                              | Human Brain Mapping        | Yes | 82  |     | Between | rsfMRI     | FC with spatial and temporal variation | Schizophrenia diagnosis                              | SVM                                       | Multivariate | Classification | K-fold |    |    | Classification accuracy  |



|    |                                                                                                         |                                                                                                                         |                         |     |     |                          |         |           |                   |                                            |                   |              |                               |        |     |     |                                             |
|----|---------------------------------------------------------------------------------------------------------|-------------------------------------------------------------------------------------------------------------------------|-------------------------|-----|-----|--------------------------|---------|-----------|-------------------|--------------------------------------------|-------------------|--------------|-------------------------------|--------|-----|-----|---------------------------------------------|
| 37 | <a href="https://doi.org/10.1002/hbm.24205">https://doi.org/10.1002/hbm.24205</a>                       | Individualized prediction of trait narcissism from whole-brain resting-state functional connectivity                    | Human Brain Mapping     | No  | 155 | From previous literature | Between | rsfMRI    | FC                | Trait narcissism                           | Linear regression | Multivariate | Regression                    | LOO    | Yes | No  | Pearson correlation, MSE                    |
| 38 | <a href="https://doi.org/10.1002/hbm.24190">https://doi.org/10.1002/hbm.24190</a>                       | Distinguishable brain networks relate disease susceptibility to symptom expression in schizophrenia                     | Human Brain Mapping     | Yes | 442 | From previous literature | Between | rsfMRI    | FC                | Schizophrenia diagnosis and symptom scores | Linear regression | Univariate   | Regression and classification | LOO    | Yes | No  | Classification accuracy, explained variance |
| 39 | <a href="https://doi.org/10.1371/journal.pone.0194856">https://doi.org/10.1371/journal.pone.0194856</a> | A general prediction model for the detection of ADHD and Autism using structural and functional MRI                     | PLOS One                | Yes | 558 | ADHD-200, ABIDE          | Between | rsfMRI    |                   | ADHD/autism diagnosis                      | SVM               | Multivariate | Classification                | K-fold | Yes | Yes | Classification accuracy                     |
| 40 | <a href="https://doi.org/10.1073/pnas.1802176115">https://doi.org/10.1073/pnas.1802176115</a>           | Neural precursors of future liking and affective reciprocity                                                            | PNAS                    | No  | 16  |                          | Between | Task fMRI | Face viewing task | Future liking of another person            | Other             | Multivariate | Regression                    | None   |     |     | Path coefficients                           |
| 41 | <a href="https://doi.org/10.1016/j.neulet.2018.04.007">https://doi.org/10.1016/j.neulet.2018.04.007</a> | Random forest based classification of alcohol dependence patients and healthy controls using resting state MRI          | Neuroscience Letters    | Yes | 92  |                          | Between | rsfMRI    | FC                | AUD diagnosis                              | Random forest     | Multivariate | Classification                | LOO    | No  | No  | Classification accuracy                     |
| 42 | <a href="https://doi.org/10.1016/j.ebiom.2018.03.017">https://doi.org/10.1016/j.ebiom.2018.03.017</a>   | Multi-Site Diagnostic Classification of Schizophrenia Using Discriminant Deep Learning with Functional Connectivity MRI | EBioMedicine            | Yes | 784 |                          | Between | rsfMRI    | FC                | Schizophrenia diagnosis                    | SVM               | Multivariate | Classification                | K-fold | No  | No  | Classification accuracy                     |
| 43 | <a href="https://doi.org/10.3389/fpsy.2018.00092">https://doi.org/10.3389/fpsy.2018.00092</a>           | Fronto-Temporal connectivity Predicts ecT Outcome in                                                                    | Frontiers in Psychiatry | Yes | 46  |                          | Between | rsfMRI    | Network metrics   | ECT outcome                                | SVM               | Multivariate | Classification                | K-fold | No  | No  | Classification accuracy                     |

|    |                                                                                                                             |                                                                                                                              |                                                                |     |     |                          |         |           |                               |                                                                             |                        |                             |                |        |     |    |                         |
|----|-----------------------------------------------------------------------------------------------------------------------------|------------------------------------------------------------------------------------------------------------------------------|----------------------------------------------------------------|-----|-----|--------------------------|---------|-----------|-------------------------------|-----------------------------------------------------------------------------|------------------------|-----------------------------|----------------|--------|-----|----|-------------------------|
|    |                                                                                                                             | Major Depression                                                                                                             |                                                                |     |     |                          |         |           |                               |                                                                             |                        |                             |                |        |     |    |                         |
| 44 | <a href="https://doi.org/10.1016/j.neuropsychologia.2018.03.023">https://doi.org/10.1016/j.neuropsychologia.2018.03.023</a> | Identification of task sets within and across stimulus modalities                                                            | Neuropsychologia                                               | No  | 20  | From previous literature | Within  | Task fMRI | FC                            | Stimulus (visual vs. auditory)/task (affective vs. semantic identification) | SVM                    | Multivariate                | Classification | LOO    | Yes | No | Classification accuracy |
| 45 | <a href="https://doi.org/10.1016/j.neuroimage.2018.03.012">https://doi.org/10.1016/j.neuroimage.2018.03.012</a>             | Template-based prediction of vigilance fluctuations in resting-state fMRI                                                    | NeuroImage                                                     | No  | 10  | From previous literature | Between | rsfMRI    |                               | Vigilance (from EEG)                                                        | Other                  | Multivariate                | Regression     | LOO    | No  | No | Correlation             |
| 46 | <a href="http://doi.org/10.1016/j.bpsc.2017.07.003">http://doi.org/10.1016/j.bpsc.2017.07.003</a>                           | Machine Learning of Functional Magnetic Resonance Imaging Network Connectivity Predicts Substance Abuse Treatment Completion | Biological Psychiatry: Cognitive Neuroscience and Neuroimaging | Yes | 139 |                          | Between | Task fMRI | Go/NoGo task                  | Substance abuse treatment completion                                        | SVM                    | Multivariate                | Classification | K-fold | Yes | No | Classification accuracy |
| 47 | <a href="http://doi.org/10.1016/j.nicl.2017.10.027">http://doi.org/10.1016/j.nicl.2017.10.027</a>                           | Removal of artifacts from resting-state fMRI data in stroke                                                                  | NeuroImage: Clinical                                           | Yes | 74  |                          | Between | rsfMRI    | FC                            | Western aphasia battery score                                               | SVM, linear regression | Multivariate and univariate | Regression     | LOO    | No  | No | Pearson correlation     |
| 48 | <a href="https://doi.org/10.1016/j.nicl.2018.02.002">https://doi.org/10.1016/j.nicl.2018.02.002</a>                         | Disruption to functional networks in neonates with perinatal brain injury T predicts motor skills at 8 months                | NeuroImage: Clinical                                           | Yes | 53  |                          | Between | Task fMRI | Disrupted FC measure          | Motor skills at 8 months                                                    | Regression             | Univariate                  | Regression     | None   |     |    | Pearson correlation     |
| 49 | <a href="https://doi.org/10.1007/s11682-018-9845-9">https://doi.org/10.1007/s11682-018-9845-9</a>                           | Variance of the global signal as a pretreatment predictor of antidepressant response in drug-naïve major                     | Brain Imaging and Behavior                                     | Yes | 47  |                          | Between | rsfMRI    | Variance of the global signal | Antidepressant treatment response                                           | Regression             | Univariate                  | Regression     | None   |     |    | Pearson correlation     |

|    |                                                                                                                 |                                                                                                                                                                                                                |                           |     |    |         |                        |                                                                              |                                           |            |              |                |        |     |    |  |                         |
|----|-----------------------------------------------------------------------------------------------------------------|----------------------------------------------------------------------------------------------------------------------------------------------------------------------------------------------------------------|---------------------------|-----|----|---------|------------------------|------------------------------------------------------------------------------|-------------------------------------------|------------|--------------|----------------|--------|-----|----|--|-------------------------|
|    |                                                                                                                 | depressive disorder                                                                                                                                                                                            |                           |     |    |         |                        |                                                                              |                                           |            |              |                |        |     |    |  |                         |
| 50 | <a href="https://doi.org/10.1016/j.neuroimage.2018.02.025">https://doi.org/10.1016/j.neuroimage.2018.02.025</a> | Dynamic fMRI networks predict success in a behavioral Weight Gain/Loss program among older adults                                                                                                              | NeuroImage                | Yes | 52 | Between | Task fMRI, rsfMRI      | Dynamic FC                                                                   | Behavioral weight-loss treatment response | SVM        | Multivariate | Classification | Other  | Yes | No |  | Classification accuracy |
| 51 | <a href="https://doi.org/10.1016/j.cortex.2018.01.009">https://doi.org/10.1016/j.cortex.2018.01.009</a>         | Prefrontal mediation of the reading network predicts intervention response in dyslexia                                                                                                                         | Cortex                    | Yes | 37 | Between | Task fMRI              | Word viewing task                                                            | Dyslexia intervention response            | Other      | Multivariate | Regression     | None   |     |    |  | Correlation             |
| 52 | <a href="https://doi.org/10.1016/j.clinph.2017.12.031">https://doi.org/10.1016/j.clinph.2017.12.031</a>         | Predicting postoperative language outcome using presurgical fMRI, MEG, TMS, and high gamma ECoG                                                                                                                | Clinical Neurophysiology  | Yes | 11 | Between | Task fMRI, MEG, hgECog | Language task, used volume of area with language-related activation as input | Decline in language ability               | SVM        | Multivariate | Classification | K-fold | No  | No |  | Classification accuracy |
| 53 | <a href="https://doi.org/10.3389/fnins.2017.00744">https://doi.org/10.3389/fnins.2017.00744</a>                 | Music Intervention Leads to Increased Insular Connectivity and Improved Clinical Symptoms in Schizophrenia                                                                                                     | Frontiers in Neuroscience | Yes | 39 | Between | rsfMRI                 | Voxel-wise FC from vAI, dAI, and PI                                          | Change in schizophrenia symptoms          | SVM        | Multivariate | Classification | LOO    | No  | No |  | Classification accuracy |
| 54 | <a href="https://doi.org/10.1016/j.wneu.2018.01.063">https://doi.org/10.1016/j.wneu.2018.01.063</a>             | Pretherapeutic Functional Imaging Allows Prediction of Head Tremor Arrest After Thalamotomy for Essential Tremor: The Role of Altered Interconnectivity Between Thalamolimbic and Supplementary Motor Circuits | World Neurosurgery        | Yes | 11 | Between | rsfMRI                 | Network interconnectivity                                                    | Tremor improvement 1 year post-surgery    | Regression | Univariate   | Regression     | None   |     |    |  | Regression p-value      |

|    |                                                                                                                 |                                                                                                                                           |                         |     |     |  |                 |                          |                                                                            |                                                       |                        |              |                |        |     |     |                              |
|----|-----------------------------------------------------------------------------------------------------------------|-------------------------------------------------------------------------------------------------------------------------------------------|-------------------------|-----|-----|--|-----------------|--------------------------|----------------------------------------------------------------------------|-------------------------------------------------------|------------------------|--------------|----------------|--------|-----|-----|------------------------------|
| 55 | <a href="https://doi.org/10.1002/hbm.23953">https://doi.org/10.1002/hbm.23953</a>                               | Prediction of activation patterns preceding hallucinations in patients with schizophrenia using machine learning with structured sparsity | Human Brain Mapping     | Yes | 36  |  | Between, pooled | rsfMRI                   | t-statistic of voxel-by-voxel regression with pre-hallucination time point | Presence of hallucination/transition to hallucination | Elastic net regression | Multivariate | Classification | LOO    | No  | No  | Classification accuracy      |
| 56 | <a href="https://doi.org/10.1073/pnas.1713532115">https://doi.org/10.1073/pnas.1713532115</a>                   | Robust prediction of individual creative ability from brain functional connectivity                                                       | PNAS                    | No  | 163 |  | Between         | Task fMRI                | Network strength in "high-creativity" or "low-creativity" networks         | Creativity score on task                              | Linear regression      | Univariate   | Regression     | LOO    | Yes | Yes | Pearson correlation          |
| 57 | <a href="https://doi.org/10.1002/hbm.23956">https://doi.org/10.1002/hbm.23956</a>                               | Motor imagery training: Kinesthetic imagery strategy and inferior parietal fMRI activation                                                | Human Brain Mapping     | No  | 48  |  | Between         | Task fMRI                | Motor imagery task                                                         | Performance after motor imagery training              | Regression             | Univariate   | Regression     | None   |     |     | Regression p-value           |
| 58 | <a href="https://doi.org/10.7554/eLife.30150.001">https://doi.org/10.7554/eLife.30150.001</a>                   | Associability-modulated loss learning is increased in posttraumatic stress disorder                                                       | eLife                   | Yes | 68  |  | Between, pooled | Task fMRI, PTSD severity | Two-arm bandit task                                                        | Switching behavior during two-armed bandit test       | Logistic regression    | Multivariate | Classification | None   |     |     | Chi-square model improvement |
| 59 | <a href="https://doi.org/10.1186/s12868-017-0395-7">https://doi.org/10.1186/s12868-017-0395-7</a>               | Stereoscopic processing of crossed and uncrossed disparities in the human visual cortex                                                   | BMC Neuroscience        | No  | 27  |  | Within          | Task fMRI                | Binocular disparity task                                                   | Positive/negative/no disparity                        | SVM                    | Multivariate | Classification | K-fold | Yes | No  | Classification accuracy      |
| 60 | <a href="https://doi.org/10.3389/fpsyg.2018.01754">https://doi.org/10.3389/fpsyg.2018.01754</a>                 | Longitudinal Task-Related Functional Connectivity Changes Predict Reading Development                                                     | Frontiers in Psychology | No  | 19  |  | Between         | Task fMRI                | Rhyming task, network metrics                                              | Change in reading skill                               | Regression             | Univariate   | Regression     | None   |     |     | Pearson correlation          |
| 61 | <a href="https://doi.org/10.1016/j.neuroimage.2018.09.058">https://doi.org/10.1016/j.neuroimage.2018.09.058</a> | Interactions between neural decision-making circuits predict long-term dietary treatment                                                  | NeuroImage              | Yes | 30  |  | Between         | Task fMRI                | Cue-reactivity and delay discounting tasks with food images                | Change in BMI                                         | Regression             | Multivariate | Regression     | None   |     |     | Regression p-value           |

|    |                                                                                                                 |                                                                                                                                                                                    |                               |     |    |                          |         |           |                                             |                                                             |            |              |                |        |     |    |                         |
|----|-----------------------------------------------------------------------------------------------------------------|------------------------------------------------------------------------------------------------------------------------------------------------------------------------------------|-------------------------------|-----|----|--------------------------|---------|-----------|---------------------------------------------|-------------------------------------------------------------|------------|--------------|----------------|--------|-----|----|-------------------------|
|    |                                                                                                                 | success in obesity                                                                                                                                                                 |                               |     |    |                          |         |           |                                             |                                                             |            |              |                |        |     |    |                         |
| 62 | <a href="https://doi.org/10.1016/j.ebiom.2018.09.012">https://doi.org/10.1016/j.ebiom.2018.09.012</a>           | Disrupted asymmetry of inter- and intra-hemispheric functional connectivity in patients with drug-naive, first-episode schizophrenia and their unaffected siblings                 | EBioMedicine                  | Yes | 46 |                          | Between | rsfMRI    | Voxel-wise FC (inter- vs intra-hemispheric) | Schizophrenia symptom response to pharmacological treatment | SVM        | Multivariate | Classification | LOO    | No  | No | Classification accuracy |
| 63 | <a href="https://doi.org/10.1073/pnas.1804641115">https://doi.org/10.1073/pnas.1804641115</a>                   | Dedifferentiation of caudate functional connectivity and striatal dopamine transporter density predict memory change in normal aging                                               | PNAS                          | Yes | 54 |                          | Between | rsfMRI    | FC                                          | Change in memory performance over time                      | Regression | Univariate   | Regression     | None   |     |    | Other                   |
| 64 | <a href="https://doi.org/10.1007/s13365-017-0607-z">https://doi.org/10.1007/s13365-017-0607-z</a>               | Neural response to working memory demand predicts neurocognitive deficits in HIV                                                                                                   | Journal of NeuroVirology      | Yes | 24 |                          | Between | Task fMRI | N-back task                                 | Cognitive performance                                       | Regression | Univariate   | Regression     | None   |     |    | Regression p-value      |
| 65 | <a href="https://doi.org/10.1016/j.neuroimage.2018.08.060">https://doi.org/10.1016/j.neuroimage.2018.08.060</a> | Cortical activation associated with motor preparation can be used to predict the freely chosen effector of an upcoming movement and reflects response time: An fMRI decoding study | NeuroImage                    | No  | 12 |                          | Within  | Task fMRI | Finger movement task                        | Free hand choice for motor action                           | Other      | Multivariate | Classification | K-fold | Yes | No | Classification accuracy |
| 66 | <a href="https://doi.org/10.3389/fninf.2018.00051">https://doi.org/10.3389/fninf.2018.00051</a>                 | Sparse Ordinal Logistic Regression and Its Application to Brain Decoding                                                                                                           | Frontiers in Neuroinformatics | No  | 1  | From previous literature | Within  | Task fMRI | Visual task                                 | Presented visual stimulus                                   | Other      | Multivariate | Regression     | K-fold | No  | No | Spearman correlation    |

|    |                                                                                                                 |                                                                                                                                                                   |                                                  |     |     |  |                    |             |                                                                                     |                                                                         |                           |              |                |        |     |    |                         |
|----|-----------------------------------------------------------------------------------------------------------------|-------------------------------------------------------------------------------------------------------------------------------------------------------------------|--------------------------------------------------|-----|-----|--|--------------------|-------------|-------------------------------------------------------------------------------------|-------------------------------------------------------------------------|---------------------------|--------------|----------------|--------|-----|----|-------------------------|
| 67 | <a href="https://doi.org/10.1016/j.jneumeth.2018.08.021">https://doi.org/10.1016/j.jneumeth.2018.08.021</a>     | Image categorization from functional magnetic resonance imaging using T functional connectivity                                                                   | Journal of Neuroscience Methods                  | No  | 14  |  | Within and between | Task fMRI   | Visual task                                                                         | Category of image stimulus                                              | SVM, random forest        | Multivariate | Classification | K-fold | No  | No | Classification accuracy |
| 68 | <a href="https://doi.org/10.1016/j.neuroimage.2018.08.035">https://doi.org/10.1016/j.neuroimage.2018.08.035</a> | Relation of neural response to palatable food tastes and images to future weight gain: Using bootstrap sampling to examine replicability of neuroimaging findings | NeuroImage                                       | Yes | 135 |  | Between            | Task fMRI   | Food viewing and tasting tasks                                                      | Future BMI gain                                                         | Regression                | Univariate   | Regression     | None   |     |    | Pearson correlation     |
| 69 | <a href="https://doi.org/10.1093/cercor/bhy200">https://doi.org/10.1093/cercor/bhy200</a>                       | Decomposing Parietal Memory Reactivation to Predict Consequences of Remembering                                                                                   | Cerebral Cortex                                  | No  | 28  |  | Between, pooled    | Task fMRI   | Memory task, pattern similarity between original presentation and memory test trial | Correct rejection/false alarm for lure stimuli during recollection task | Lasso logistic regression | Multivariate | Classification | LXO    | Yes | No | Classification accuracy |
| 70 | <a href="https://doi.org/10.1093/ijnp/pyy069">https://doi.org/10.1093/ijnp/pyy069</a>                           | Predicting Treatment Response in Depression: The Role of Anterior Cingulate Cortex                                                                                | International Journal of Neuropsychopharmacology | Yes | 32  |  | Between            | Task fMRI   | Facial affect task                                                                  | Response to escitalopram                                                | Other                     | Multivariate | Classification | LOO    | No  | No | Classification accuracy |
| 71 | <a href="https://doi.org/10.1016/j.dcn.2018.07.003">https://doi.org/10.1016/j.dcn.2018.07.003</a>               | Individual differences in functional brain connectivity predict temporal discounting preference in the transition to adolescence                                  | Developmental Cognitive Neuroscience             | No  | 148 |  | Between            | rsfMRI, age | FC                                                                                  | Temporal discounting behavior                                           | Regression                | Multivariate | Regression     | None   |     |    | Regression p-value      |
| 72 | <a href="https://doi.org/10.1016/j.schres.2018.07.045">https://doi.org/10.1016/j.schres.2018.07.045</a>         | Cognitive control network dysconnectivity                                                                                                                         | Schizophrenia Research                           | Yes | 28  |  | Between            | Task fMRI   | Stroop task, FC                                                                     | Pharmacological treatment response                                      | Regression                | Univariate   | Regression     | None   |     |    | Regression p-value      |

|    |                                                                                                             |                                                                                                                                     |                                   |     |    |         |           |                                                                           |                                                                                   |            |            |            |      |  |  |                     |
|----|-------------------------------------------------------------------------------------------------------------|-------------------------------------------------------------------------------------------------------------------------------------|-----------------------------------|-----|----|---------|-----------|---------------------------------------------------------------------------|-----------------------------------------------------------------------------------|------------|------------|------------|------|--|--|---------------------|
|    |                                                                                                             | y and response to antipsychotic treatment in schizophrenia                                                                          |                                   |     |    |         |           |                                                                           |                                                                                   |            |            |            |      |  |  |                     |
| 73 | <a href="https://doi.org/10.1162/jocn_a_01218">https://doi.org/10.1162/jocn_a_01218</a>                     | Memory Contextualization: The Role of Prefrontal Cortex in Functional Integration across Item and Context Representational Regions  | Journal of Cognitive Neuroscience | No  | 21 | Between | Task fMRI | Contextual memory task, FC                                                | Difference in memory performance between same-context and switched-context trials | Other      | Univariate | Regression | None |  |  | Regression p-value  |
| 74 | <a href="https://doi.org/10.1089/neu.2018.5739">https://doi.org/10.1089/neu.2018.5739</a>                   | Longitudinal Resting State Functional Connectivity Predicts Clinical Outcome in Mild Traumatic Brain Injury                         | Journal of Neurotrauma            | Yes | 91 | Between | rsfMRI    | Network connectivity                                                      | Symptom severity                                                                  | Regression | Univariate | Regression | None |  |  | Regression p-value  |
| 75 | <a href="https://doi.org/10.1002/hipo.23003">https://doi.org/10.1002/hipo.23003</a>                         | Functional connectivity in category-selective brain networks after encoding predicts subsequent memory                              | Hippocampus                       | No  | 20 | Between | rsfMRI    | FC                                                                        | Memory performance                                                                | Regression | Univariate | Regression | None |  |  | Pearson correlation |
| 76 | <a href="https://doi.org/10.1016/j.neurosci.2018.07.004">https://doi.org/10.1016/j.neurosci.2018.07.004</a> | Neural activity to threat in ventromedial prefrontal cortex correlates with individual differences in anxiety and reward processing | Neuropsychologia                  | No  | 26 | Between | Task fMRI | Threat response task                                                      | Efficiency in reward processing                                                   | Regression | Univariate | Regression | None |  |  | Explained variance  |
| 77 | <a href="https://doi.org/10.1523/JNEUROSCI.3336-17.2018">https://doi.org/10.1523/JNEUROSCI.3336-17.2018</a> | Neural Computations Underlying Causal Structure Learning                                                                            | Journal of Neuroscience           | No  | 20 | Between | Task fMRI | Predictive accuracy from given ROI signal for behavior on training trials | Task performance (context- and cue-based outcome prediction)                      | Other      | Univariate | Regression | None |  |  | Pearson correlation |

|    |                                                                                                                             |                                                                                                                                              |                                                    |     |     |     |         |           |                            |                                              |                        |                             |                |        |     |     |                         |
|----|-----------------------------------------------------------------------------------------------------------------------------|----------------------------------------------------------------------------------------------------------------------------------------------|----------------------------------------------------|-----|-----|-----|---------|-----------|----------------------------|----------------------------------------------|------------------------|-----------------------------|----------------|--------|-----|-----|-------------------------|
| 78 | <a href="https://doi.org/10.1162/netn_a_00010">https://doi.org/10.1162/netn_a_00010</a>                                     | Fluid and flexible minds: Intelligence reflects synchrony in the brain. AOs intrinsic network architecture                                   | Network Neuroscience                               | No  | 830 | HCP | Between | rsfMRI    | Network connectivity       | Fluid intelligence and cognitive flexibility | LASSO regression       | Multivariate                | Regression     | None   |     |     | Pearson correlation     |
| 79 | <a href="https://doi.org/10.1162/jocn_a_01288">https://doi.org/10.1162/jocn_a_01288</a>                                     | The Fusiform and Occipital Face Areas Can Process a Nonface Category Equivalently to Faces                                                   | Journal of Cognitive Neuroscience                  | No  | 21  |     | Between | Task fMRI | Same-different object task | Reaction time                                | Regression             | Univariate                  | Regression     | None   |     |     | Explained variance      |
| 80 | <a href="https://doi.org/10.1089/cap.2017.0030">https://doi.org/10.1089/cap.2017.0030</a>                                   | Neurofunctional Correlates of Response to Quetiapine in Adolescents with Bipolar Depression                                                  | Journal of Child and Adolescent Psychopharmacology | Yes | 10  |     | Between | Task fMRI | Affective pictures task    | Response to bipolar treatment                | Regression             | Univariate                  | Regression     | None   |     |     | Explained variance      |
| 81 | <a href="https://doi.org/10.1016/j.neuropsychologia.2018.05.002">https://doi.org/10.1016/j.neuropsychologia.2018.05.002</a> | Connectivity patterns in cognitive control networks predict naturalistic multitasking ability                                                | Neuropsychologia                                   | No  | 106 |     | Between | rsfMRI    | FC, network metrics        | Multitasking performance                     | SVM, linear regression | Multivariate and univariate | Regression     | K-fold | No  | No  | Pearson correlation     |
| 82 | <a href="https://doi.org/10.1002/hbm.24200">https://doi.org/10.1002/hbm.24200</a>                                           | Estimation of vocational aptitudes using functional brain networks                                                                           | Human Brain Mapping                                | No  | 112 |     | Between | rsfMRI    | FC                         | Vocational aptitudes                         | SVM                    | Multivariate                | Classification | K-fold | No  | Yes | Classification accuracy |
| 83 | <a href="https://doi.org/10.3766/jaaa.16149">https://doi.org/10.3766/jaaa.16149</a>                                         | fMRI as a Preimplant Objective Tool to Predict Children. AOs Postimplant Auditory and Language Outcomes as Measured by Parental Observations |                                                    | Yes | 12  |     | Between | Task fMRI | Auditory task              | Language skills 2 years post-implant         | Regression             | Univariate                  | Regression     | None   |     |     | Spearman correlation    |
| 84 | <a href="https://doi.org/10.3389/fnagi.2018.00094">https://doi.org/10.3389/fnagi.2018.00094</a>                             | Resting-State Functional Connectivity Predicts Cognitive Impairment                                                                          | Frontiers in Aging Neuroscience                    | Yes | 59  |     | Between | rsfMRI    | FC, network metrics        | Alzheimer's disease score                    | Linear regression      | Univariate                  | Regression     | LOO    | Yes | No  | Spearman correlation    |



|    |                                                                                                                             |                                                                                                                                                                                            |                                             |     |     |                          |         |           |                                                                             |                                                 |                     |              |                |        |     |                     |       |
|----|-----------------------------------------------------------------------------------------------------------------------------|--------------------------------------------------------------------------------------------------------------------------------------------------------------------------------------------|---------------------------------------------|-----|-----|--------------------------|---------|-----------|-----------------------------------------------------------------------------|-------------------------------------------------|---------------------|--------------|----------------|--------|-----|---------------------|-------|
|    |                                                                                                                             | Related to Alzheimer, Åôs Disease                                                                                                                                                          |                                             |     |     |                          |         |           |                                                                             |                                                 |                     |              |                |        |     |                     |       |
| 85 | <a href="https://doi.org/10.1016/j.conctc.2018.02.003">https://doi.org/10.1016/j.conctc.2018.02.003</a>                     | Effects and mechanism of the HECT study (hybrid exercise-cognitive trainings) in mild ischemic stroke with cognitive decline: fMRI for brain plasticity, biomarker and behavioral analysis | Contemporary Clinical Trials Communications | Yes | 75  |                          | Between | rsfMRI    |                                                                             | Improvements in cognitive performance           |                     |              |                | None   |     |                     |       |
| 86 | <a href="https://doi.org/10.1016/j.bpsc.2018.03.005">https://doi.org/10.1016/j.bpsc.2018.03.005</a>                         | Blunted Frontostriatal Blood Oxygen Level-Dependent Signals Predict Stimulant and Marijuana Use                                                                                            | Biological Psychiatry: CNNI                 | Yes | 110 |                          | Between | Task fMRI | Risky gains task                                                            | Problem stimulant use                           | Regression          | Univariate   | Classification | None   |     | Other               |       |
| 87 | <a href="https://doi.org/10.1002/pchj.212">https://doi.org/10.1002/pchj.212</a>                                             | Intrinsic spontaneous brain activity predicts individual variability in associative memory in older adults                                                                                 | PsyCh Journal                               | Yes | 102 |                          | Between | rsfMRI    | ALFF, FC                                                                    | Memory task performance                         | Regression          | Univariate   | Regression     | None   |     | Correlation         |       |
| 88 | <a href="https://doi.org/10.1038/s41467-018-03664-4">https://doi.org/10.1038/s41467-018-03664-4</a>                         | Towards a new approach to reveal dynamical organization of the brain using topological data analysis                                                                                       | Nature Communications                       | No  | 18  | From previous literature | Between | Task fMRI | Network metrics                                                             | Cognitive task performance                      | Regression          | Univariate   | Regression     | None   |     | Correlation         |       |
| 89 | <a href="https://doi.org/10.1016/j.neuropsychologia.2018.03.037">https://doi.org/10.1016/j.neuropsychologia.2018.03.037</a> | Neural overlap of L1 and L2 semantic representations across visual and auditory modalities: a decoding approach                                                                            | Neuropsychologia                            | No  | 22  |                          | Within  | Task fMRI | Activation pattern associated with reading or hearing words in one language | Word read/written /said/heard in other language | K nearest neighbors | Multivariate | Classification | K-fold | Yes | No                  | Other |
| 90 | <a href="https://doi.org/10.1016/j.psyneuen.2018.03.003">https://doi.org/10.1016/j.psyneuen.2018.03.003</a>                 | Diet matters: Glucocorticoid-related                                                                                                                                                       | Psychoneuroendocrinology                    | Yes | 34  |                          | Between | rsfMRI    | FC                                                                          | Caloric intake, weight                          | Regression          | Univariate   | Regression     | None   |     | Pearson correlation |       |

|    |                                                                                                             |                                                                                                                                                  |                                             |     |     |  |         |           |                                                                                                                        |                                           |            |              |                |      |     |    |                          |
|----|-------------------------------------------------------------------------------------------------------------|--------------------------------------------------------------------------------------------------------------------------------------------------|---------------------------------------------|-----|-----|--|---------|-----------|------------------------------------------------------------------------------------------------------------------------|-------------------------------------------|------------|--------------|----------------|------|-----|----|--------------------------|
|    | 2018.03.008                                                                                                 | neuroadaptations associated with calorie intake in female rhesus monkeys                                                                         |                                             |     |     |  |         |           | gain, body fat gain                                                                                                    |                                           |            |              |                |      |     |    |                          |
| 91 | <a href="https://doi.org/10.1093/scan/nsy007">https://doi.org/10.1093/scan/nsy007</a>                       | Global brain dynamics during social exclusion predict subsequent behavioral conformity                                                           | Social Cognitive and Affective Neuroscience | No  | 57  |  | Between | Task fMRI | Social inclusion/exclusion task, used difference in regional global connectivity during inclusion and exclusion trials | Future conformity behavior                |            | Multivariate | Regression     | LOO  | Yes | No | Explained variance, RMSE |
| 92 | <a href="https://doi.org/10.1016/j.jdcn.2018.02.005">https://doi.org/10.1016/j.jdcn.2018.02.005</a>         | Neural cognitive control moderates the association between insular risk processing and risk-taking behaviors via perceived stress in adolescents | Developmental Cognitive Neuroscience        | No  | 167 |  | Between | Task fMRI | Lottery choice and cognitive control tasks                                                                             | Perceived stress, risk-taking behaviors   | Other      | Multivariate | Regression     | None |     |    | Regression p-value       |
| 93 | <a href="https://doi.org/10.1038/s41398-017-0005-6">https://doi.org/10.1038/s41398-017-0005-6</a>           | Stimulated left DLPFC-nucleus accumbens functional connectivity predicts the anti-depression and anti-anxiety effects of rTMS for depression     | Translational Psychiatry                    | Yes | 22  |  | Between | rsfMRI    | ALFF, FC, regional homogeneity                                                                                         | rTMS treatment response                   | Regression | Univariate   | Regression     | None |     |    | Pearson correlation      |
| 94 | <a href="https://doi.org/10.1523/JNEUROSCI.2307-17.2018">https://doi.org/10.1523/JNEUROSCI.2307-17.2018</a> | Human V4 Activity Patterns Predict Behavioral Performance in Imagery of Object Color                                                             | Journal of Neuroscience                     | No  | 18  |  | Within  | Task fMRI | Color viewing/visualizing task                                                                                         | Color of real object or of mental imagery | Other      | Multivariate | Classification | LXO  | Yes | No | Classification accuracy  |
| 95 | <a href="https://doi.org/10.1016/j.neuroimage">https://doi.org/10.1016/j.neuroimage</a>                     | Decoding the neural signatures of                                                                                                                | NeuroImage                                  | No  | 54  |  | Within  | Task fMRI | Auditory task                                                                                                          | Emotion of presented sound                | SVM        | Multivariate | Classification | LXO  | No  | No | Classification accuracy  |

|     |                                                                                                                 |                                                                                                                                                                  |                                             |     |     |         |           |                         |                                                               |                   |              |                |      |     |    |                         |
|-----|-----------------------------------------------------------------------------------------------------------------|------------------------------------------------------------------------------------------------------------------------------------------------------------------|---------------------------------------------|-----|-----|---------|-----------|-------------------------|---------------------------------------------------------------|-------------------|--------------|----------------|------|-----|----|-------------------------|
|     | e.2018.02.058                                                                                                   | emotions expressed through sound                                                                                                                                 |                                             |     |     |         |           |                         |                                                               |                   |              |                |      |     |    |                         |
| 96  | <a href="https://doi.org/10.1016/j.ijpsycho.2018.02.001">https://doi.org/10.1016/j.ijpsycho.2018.02.001</a>     | Interoception sensitivity in the parental brain during the first months of parenting modulates children's somatic symptoms six years later: The role of oxytocin | International Journal of Psychophysiology   | No  | 45  | Between | Task fMRI | Infant interaction task | Child somatic symptoms (6 years later)                        | Regression        | Univariate   | Regression     | None |     |    | Pearson correlation     |
| 97  | <a href="https://doi.org/10.1016/j.yebeh.2017.11.018">https://doi.org/10.1016/j.yebeh.2017.11.018</a>           | Adapting a memory fMRI research protocol in clinical routine: Feasibility and results                                                                            | Epilepsy & Behavior                         | Yes | 18  | Between | Task fMRI | Memory task             | Postoperative memory decline in medial temporal lobe epilepsy |                   |              | Classification | None |     |    | Classification accuracy |
| 98  | <a href="https://doi.org/10.1016/j.drugalcdep.2017.12.015">https://doi.org/10.1016/j.drugalcdep.2017.12.015</a> | Psychosocial and neural indicators of resilience among youth with a family history of substance use disorder                                                     | Drug and Alcohol Dependence                 | Yes | 57  | Between | Task fMRI | Go/No-Go task           | Resilience in early adolescence                               | Regression        | Multivariate | Classification | None |     |    | Other                   |
| 99  | <a href="https://doi.org/10.1093/scan/nsy002">https://doi.org/10.1093/scan/nsy002</a>                           | Resting-state functional connectivity predicts neuroticism and extraversion in novel individuals                                                                 | Social Cognitive and Affective Neuroscience | No  | 114 | Between | rsfMRI    | FC                      | Big 5 trait scores                                            | Linear regression | Multivariate | Regression     | LOO  | Yes | No | Pearson correlation     |
| 100 | <a href="https://doi.org/10.1016/j.jpsychires.2018.01.001">https://doi.org/10.1016/j.jpsychires.2018.01.001</a> | Resting-state fMRI signals in offspring of parents with bipolar disorder at the high-risk and ultra-high-risk stages and their relations with cognitive function | Journal of Psychiatric Research             | Yes | 50  | Between | rsfMRI    | ALFF, FC                | Cognitive performance                                         | Regression        | Univariate   | Regression     | None |     |    | Regression p-value      |
